# Supplementary material for: Dihydromyricetin prevents obesity via regulating bile acid metabolism associated with the farnesoid X receptor in ob/ob mice
Source: Royal Society of Chemistry journal article supplement (doi:10.1039/d1fo03971g), 2022-01-01

## Electronic Supplementary Information

Dihydromyricetin prevents obesity via regulating bile acid metabolism associated with the farnesoid X receptor in  
*ob/ob* mice

YanJun Song,<sup>a,b</sup> Le Sun<sup>a,b</sup>, Pei Ma<sup>a,b</sup>, Lijia Xu<sup>a,b\*</sup>, Peigen Xiao<sup>a,b</sup>

<sup>a</sup> Institute of Medicinal Plant Development, Chinese Academy of Medical Sciences, Peking Union Medical  
College, Beijing, 100193, China

<sup>b</sup> Key Laboratory of Bioactive Substances and Resources Utilization of Chinese Herbal Medicine, Ministry of  
Education, Beijing, 100193, China

\* Correspondence: Lijia Xu, [ljxu@implad.ac.cn](mailto:ljxu@implad.ac.cn)

Supplementary Table 1 The equations of standard linear regression curves

| Index           | RT   | Equation                        | r       | Weighting | LLOQ | ULOQ |
|-----------------|------|---------------------------------|---------|-----------|------|------|
| TLCA-3S         | 0.06 | $y = 7.81725e-4 x - 4.94137e-4$ | 0.99302 | 1 / x     | 8    | 2000 |
| DLCA            | 0.04 | $y = 0.02649 x + 0.02337$       | 0.99652 | 1 / x     | 2    | 2000 |
| IALCA           | 0.04 | $y = 0.00839 x + 5.82201e-4$    | 0.99746 | 1 / x     | 8    | 2000 |
| ILCA            | 0.04 | $y = 0.01110 x - 0.00363$       | 0.99708 | 1 / x     | 2    | 2000 |
| LCA             | 0.03 | $y = 0.01319 x + 0.05799$       | 0.99974 | 1 / x     | 8    | 2000 |
| 23-DCA          | 0.05 | $y = 0.00724 x + 0.00240$       | 0.99785 | 1 / x     | 8    | 2000 |
| 7-KLCA          | 0.04 | $y = 0.00425 x + 0.00135$       | 0.99613 | 1 / x     | 8    | 2000 |
| 12-KLCA         | 0.05 | $y = 0.01703 x + 0.00254$       | 0.99984 | 1 / x     | 8    | 2000 |
| 3-oxo-DCA       | 0.04 | $y = 0.00243 x + 7.73175e-4$    | 0.99754 | 1 / x     | 8    | 2000 |
| MDCA            | 0.08 | $y = 0.00728 x + 0.00161$       | 0.99821 | 1 / x     | 8    | 2000 |
| 3 $\beta$ -UDCA | 0.06 | $y = 0.00745 x + 0.00651$       | 0.99808 | 1 / x     | 4    | 2000 |
| 3 $\beta$ -HDCA | 0.05 | $y = 0.00799 x + 0.00141$       | 0.9982  | 1 / x     | 8    | 2000 |
| UDCA            | 0.06 | $y = 0.00591 x + 0.00146$       | 0.99787 | 1 / x     | 8    | 2000 |
| HDCA            | 0.05 | $y = 0.00218 x + 0.00183$       | 0.99881 | 1 / x     | 4    | 2000 |

---

|                |      |                              |         |       |   |      |
|----------------|------|------------------------------|---------|-------|---|------|
| 3 $\beta$ -DCA | 0.05 | $y = 0.00702 x + 0.00199$    | 0.99893 | 1 / x | 2 | 2000 |
| CDCA           | 0.04 | $y = 0.00443 x + 0.01073$    | 0.99687 | 1 / x | 8 | 2000 |
| DCA            | 0.04 | $y = 0.00977 x + 0.01132$    | 0.99706 | 1 / x | 4 | 2000 |
| IDCA           | 0.05 | $y = 0.01442 x + 0.00902$    | 0.99876 | 1 / x | 4 | 2000 |
| NCA            | 0.07 | $y = 0.01551 x + 0.00307$    | 0.99849 | 1 / x | 8 | 2000 |
| DHCA           | 0.08 | $y = 0.00636 x + 0.00240$    | 0.99935 | 1 / x | 8 | 2000 |
| 7,12-DKLCA     | 0.05 | $y = 0.00278 x + 0.00317$    | 0.99855 | 1 / x | 8 | 2000 |
| 6,7-DKLCA      | 0.04 | $y = 0.00645 x + 0.00446$    | 0.9984  | 1 / x | 8 | 2000 |
| 7-KDCA         | 0.08 | $y = 0.00296 x + 4.61388e-5$ | 0.99906 | 1 / x | 8 | 2000 |
| 12-oxo-CDCA    | 0.08 | $y = 0.00281 x - 5.56459e-4$ | 0.9992  | 1 / x | 8 | 2000 |
| 3-oxo-CA       | 0.08 | $y = 0.01443 x + 0.00722$    | 0.99834 | 1 / x | 8 | 2000 |
| UCA            | 0.06 | $y = 0.01345 x + 0.00110$    | 0.99947 | 1 / x | 4 | 2000 |
| $\omega$ -MCA  | 0.08 | $y = 0.00607 x + 0.00140$    | 0.99862 | 1 / x | 8 | 2000 |
| 3 $\beta$ -CA  | 0.07 | $y = 0.01633 x + 0.00172$    | 0.99935 | 1 / x | 4 | 2000 |
| $\alpha$ -MCA  | 0.06 | $y = 0.00371 x - 0.00132$    | 0.99579 | 1 / x | 8 | 2000 |
| $\beta$ -MCA   | 0.07 | $y = 0.00518 x + 9.52256e-4$ | 0.99987 | 1 / x | 4 | 2000 |
| HCA            | 0.08 | $y = 0.00409 x + 8.52121e-4$ | 0.99937 | 1 / x | 8 | 2000 |
| CA             | 0.08 | $y = 0.03558 x + 0.00990$    | 0.99808 | 1 / x | 4 | 2000 |
| GLCA           | 0.05 | $y = 0.00988 x + 0.00505$    | 0.99608 | 1 / x | 4 | 2000 |
| GUDCA          | 0.07 | $y = 0.01813 x + 1.17005e-4$ | 0.99719 | 1 / x | 8 | 2000 |
| GCDCA          | 0.09 | $y = 0.01100 x + 0.00356$    | 0.9991  | 1 / x | 8 | 2000 |
| GDCA           | 0.1  | $y = 0.00828 x - 1.43275e-5$ | 0.99427 | 1 / x | 8 | 2000 |
| LCA-3S         | 0.05 | $y = 0.00594 x - 7.35753e-7$ | 0.99952 | 1 / x | 4 | 2000 |
| GDHCA          | 0.04 | $y = 0.00389 x + 9.41999e-4$ | 0.99951 | 1 / x | 8 | 2000 |

---

---

|           |      |                              |         |       |    |      |
|-----------|------|------------------------------|---------|-------|----|------|
| GHCA      | 0.06 | $y = 0.04995 x + 0.01152$    | 0.99916 | 1 / x | 8  | 2000 |
| GCA       | 0.06 | $y = 0.10348 x + 0.01540$    | 0.99926 | 1 / x | 8  | 2000 |
| TLCA      | 0.05 | $y = 0.20202 x + 0.04953$    | 0.99886 | 1 / x | 4  | 2000 |
| TUDCA     | 0.11 | $y = 0.02080 x + 3.92192e-6$ | 0.99925 | 1 / x | 4  | 2000 |
| TCDCa     | 0.06 | $y = 0.00733 x - 5.13483e-4$ | 0.99951 | 1 / x | 8  | 2000 |
| TDCA      | 0.08 | $y = 0.00865 x - 0.00301$    | 0.99968 | 1 / x | 4  | 2000 |
| TDHCA     | 0.05 | $y = 0.00806 x + 0.01300$    | 0.99433 | 1 / x | 8  | 2000 |
| GLCA-3S   | 0.07 | $y = 0.03142 x + 4.62714e-4$ | 0.99548 | 1 / x | 8  | 2000 |
| Tβ-MCA    | 0.05 | $y = 0.02001 x + 0.01789$    | 0.9955  | 1 / x | 8  | 2000 |
| THCA      | 0.05 | $y = 0.01561 x + 0.00108$    | 0.99951 | 1 / x | 8  | 2000 |
| TCA       | 0.05 | $y = 0.01071 x + 0.00354$    | 0.99959 | 1 / x | 8  | 2000 |
| CDCA-3Gln | 0.07 | $y = 0.02372 x + 0.00648$    | 0.9992  | 1 / x | 20 | 2000 |

---

## Supplementary Figures

**Supplementary Figure 1.** The immunoblot was performed using FXR;  $\beta$ -actin was used as an internal reference.

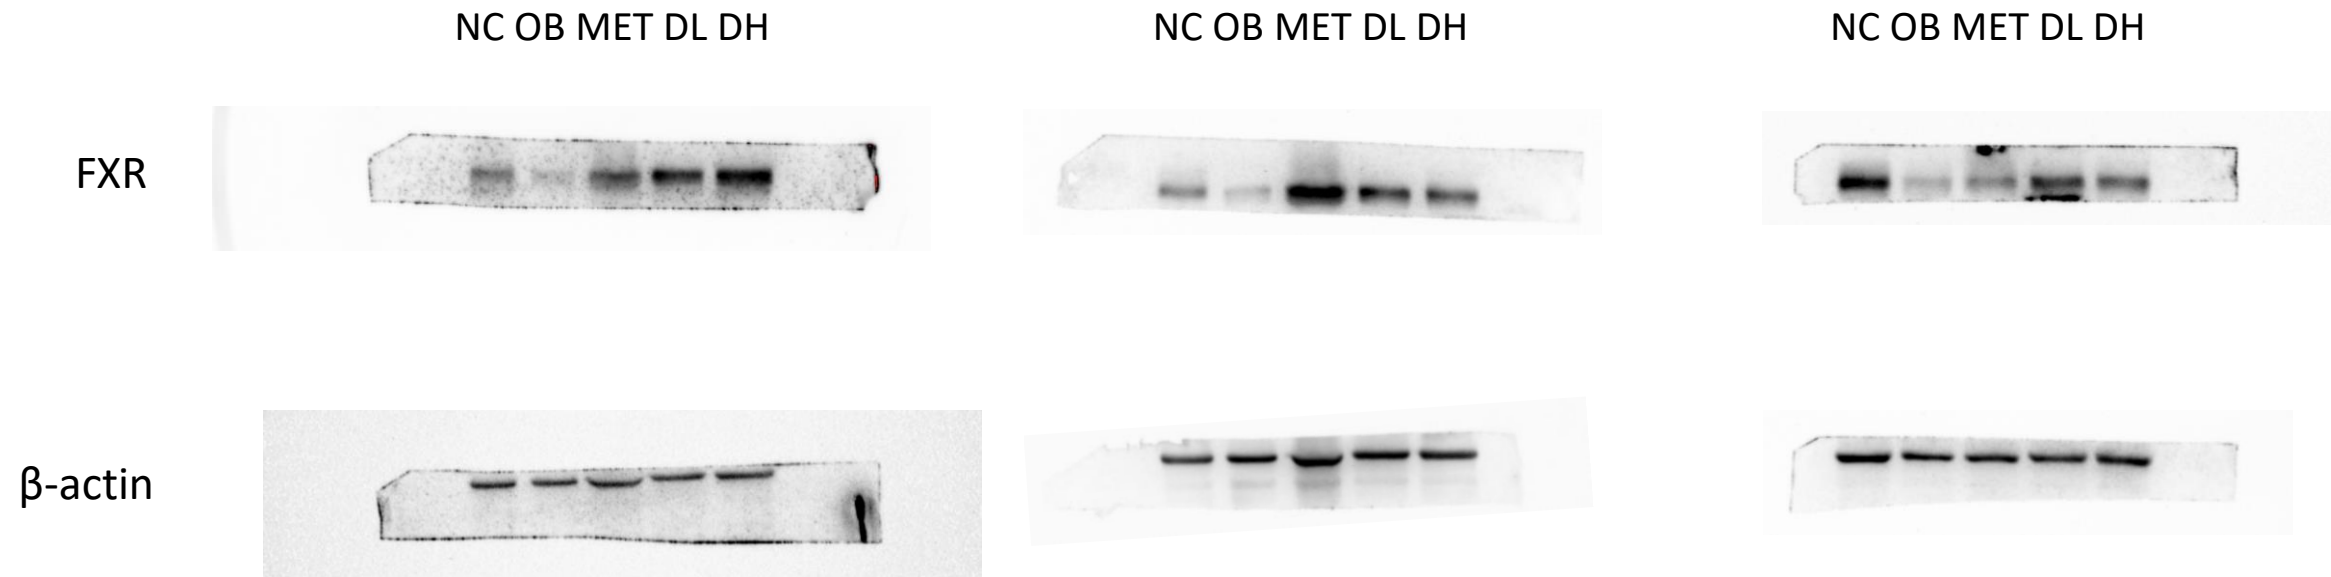

## Supplementary Figures

**Supplementary Figure 2.** The immunoblot was performed using SREBP-1C;  $\beta$ -actin was used as an internal reference.

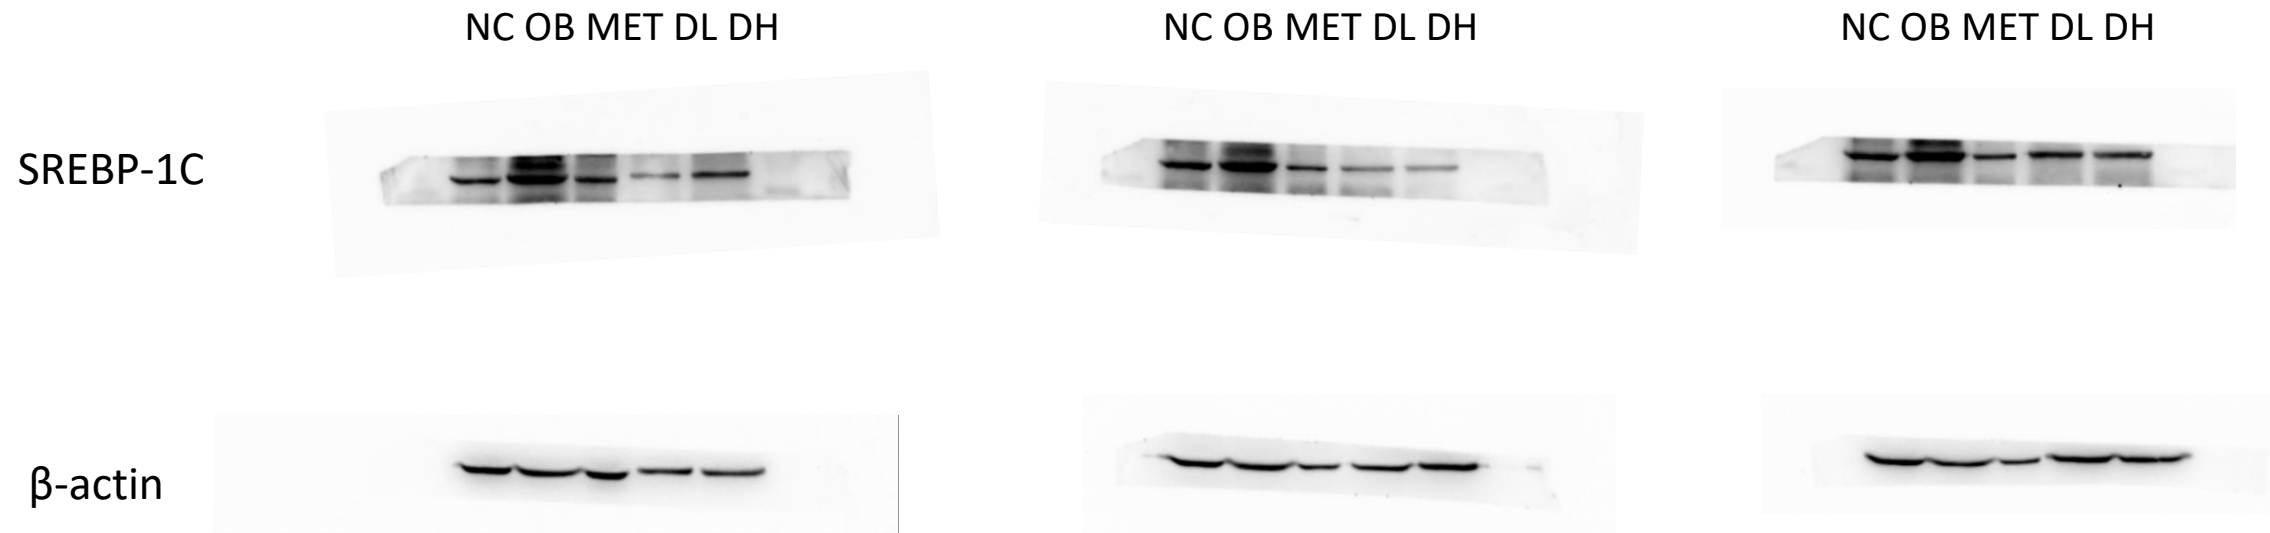

## Supplementary Figures

**Supplementary Figure 3.** The immunoblot was performed using FAS;  $\beta$ -actin was used as an internal reference.

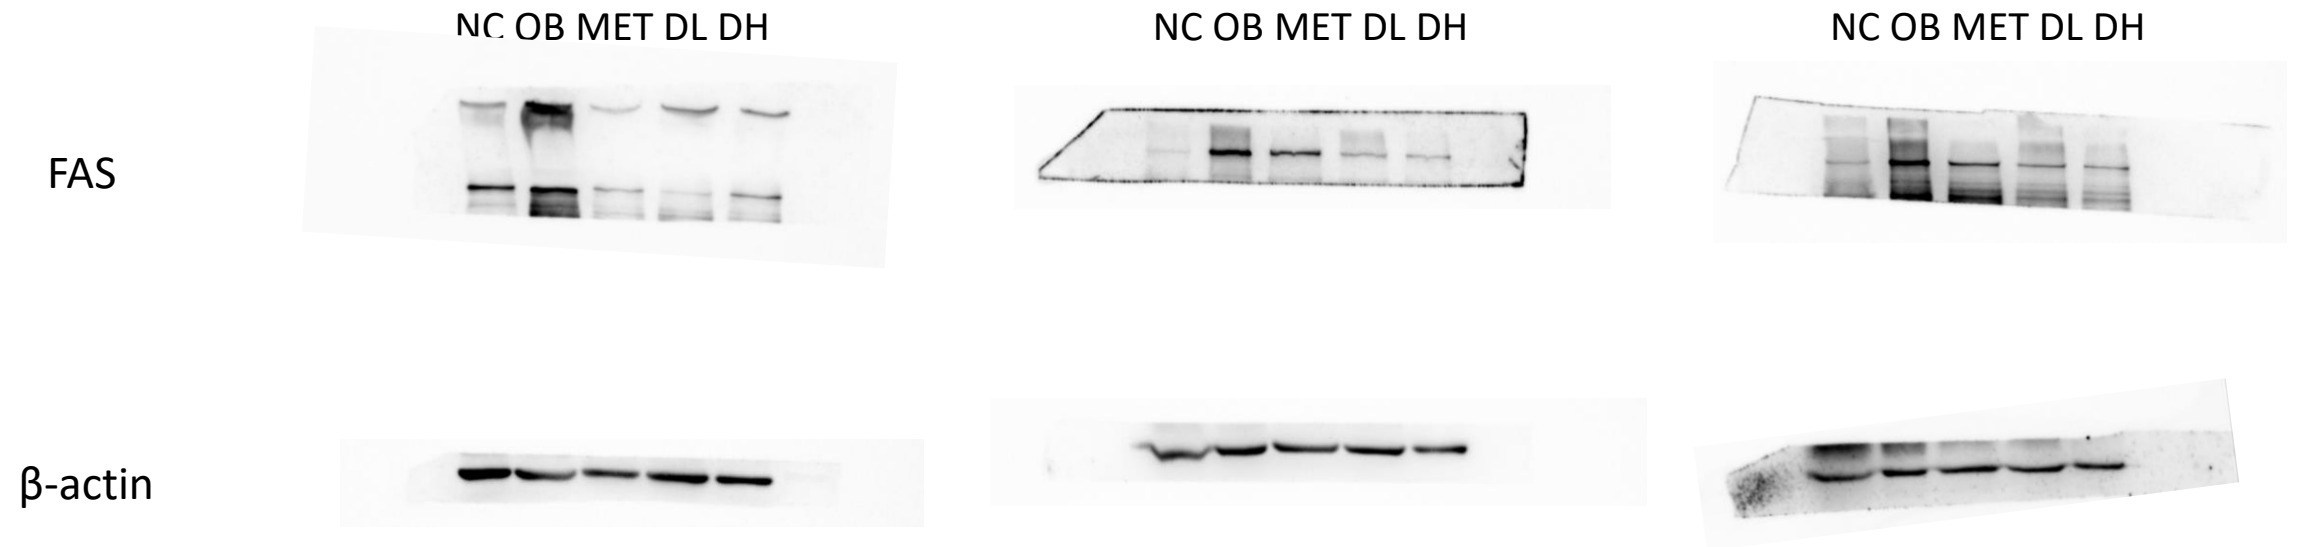

## Supplementary Figures

**Supplementary Figure 4.** The immunoblot was performed using ACC and P-ACC;  $\beta$ -actin was used as an internal reference.

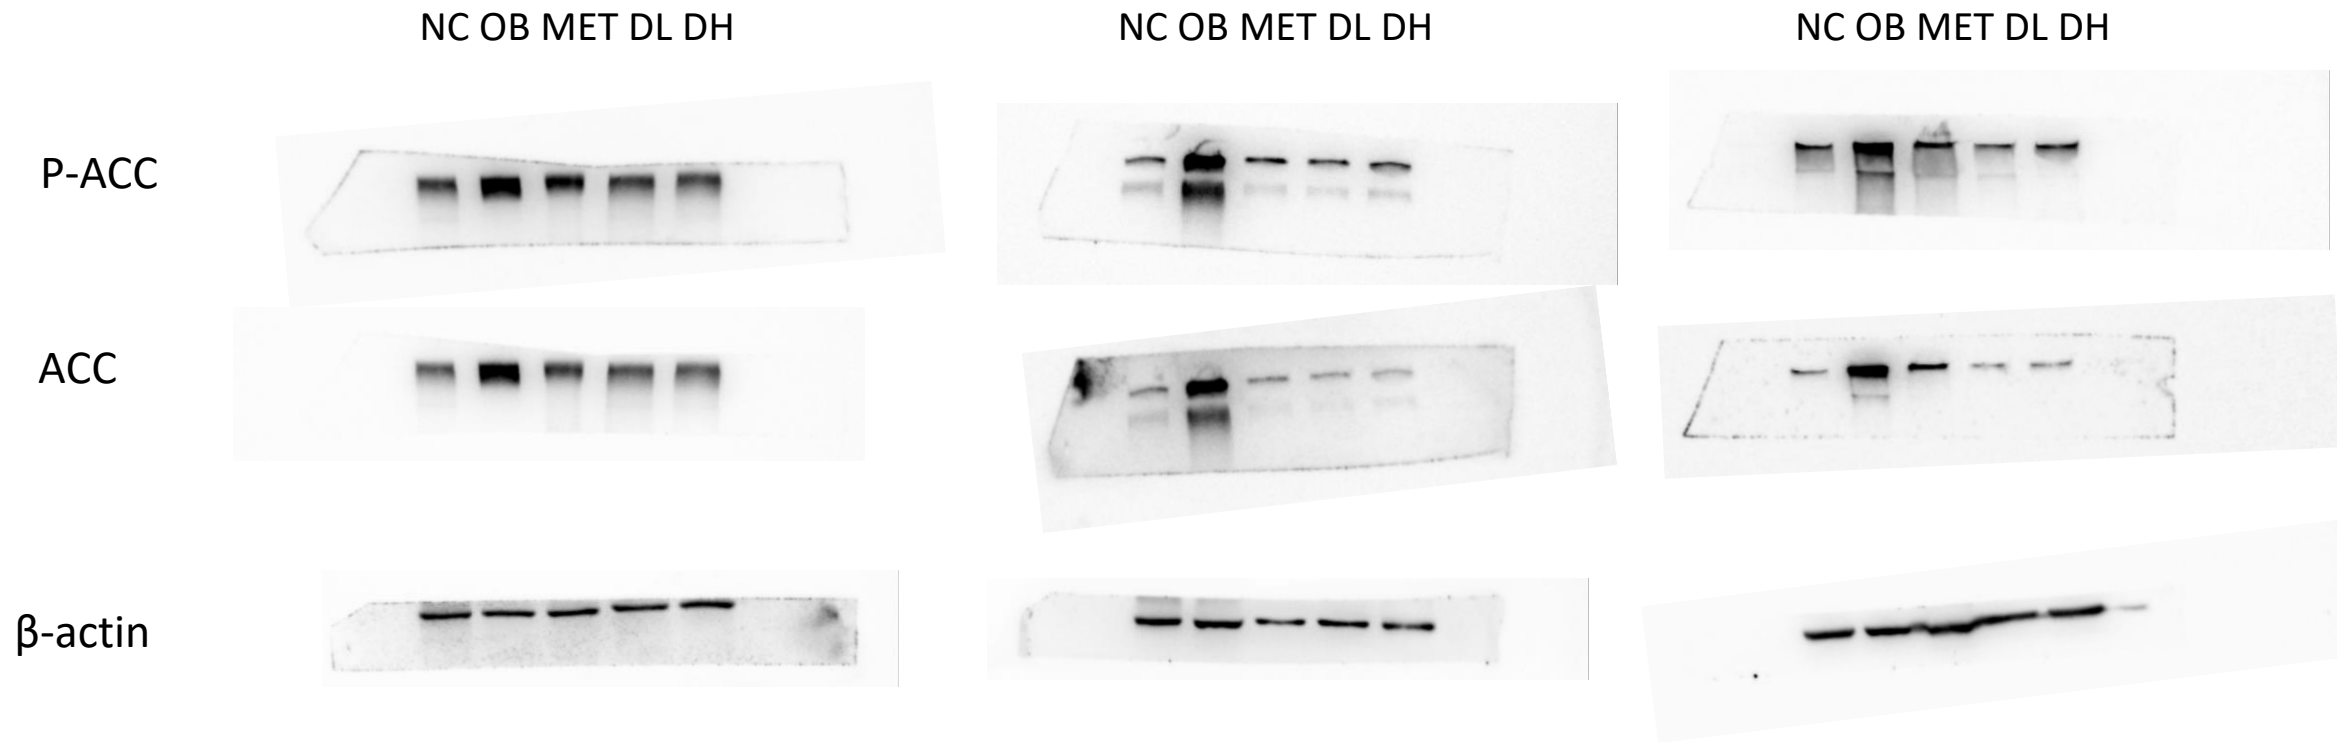

Supplement: d1fo03971g1.pdf [file d1fo03971g1.pdf]
